# Supplementary material for: Phenol and Cr(vi) degradation with Mn ion doped ZnO under visible light photocatalysis
Source: Royal Society of Chemistry journal article supplement (doi:10.1039/c7ra08172c), 2017-01-01
Supplement: c7ra08172c1.pdf [file c7ra08172c1.pdf]

## Phenol and Cr(VI) degradation with Mn ion doped ZnO under Visible light photocatalysis

Supporting Information:

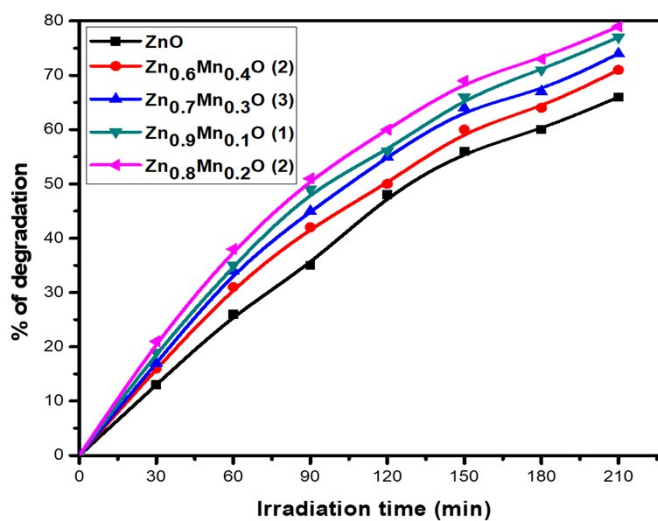

**Figure S1:** Degradation percentages of phenol in aqueous solution. Mn percentage vary from 0.1% to 0.4%, Irradiation Time=210 min, catalyst amount=40mg/L, phenol concentration=20 ppm.

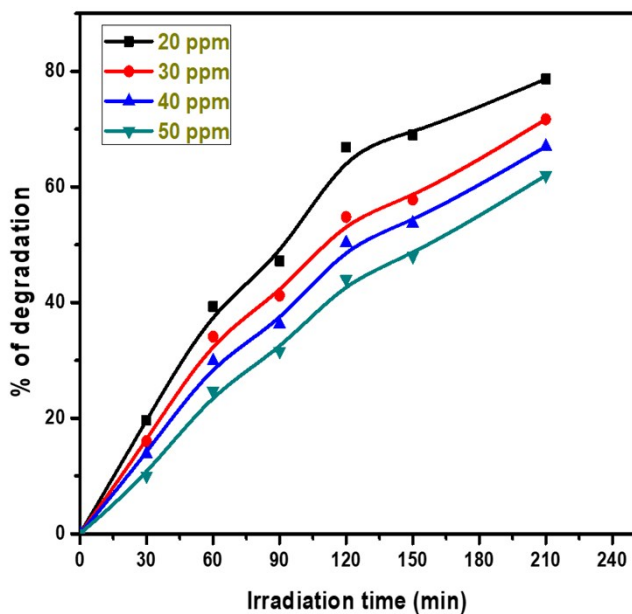

**Figure S2:** The degradation percentages of various phenol concentration. Irradiation time = 210 min, catalyst amount = 40 mg/L.

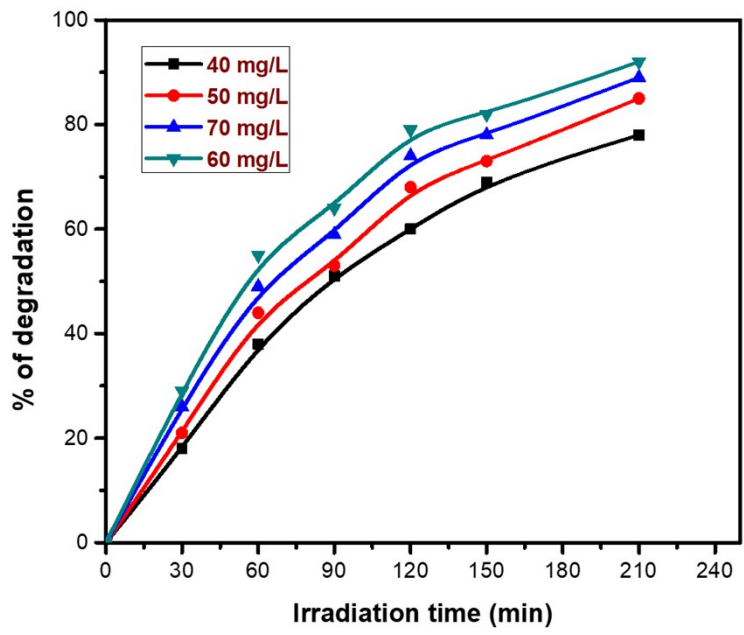

**Figure S3:** The degradation percentages of different amounts of catalysts. Irradiation time = 210 min, phenol concentration = 30 ppm.

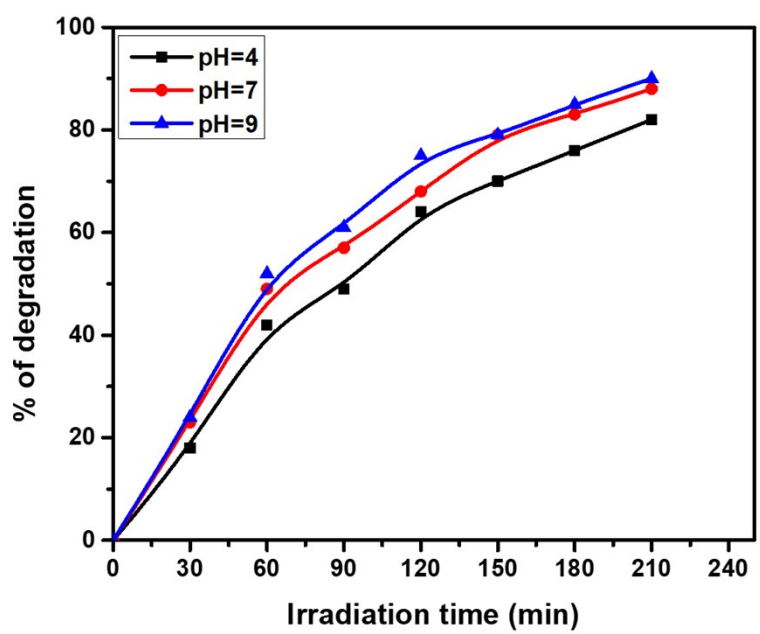

**Figure S4:** The degradation percentages of various pH values. Irradiation time = 210 min, catalyst amount = 40 mg/L, phenol concentration = 30 ppm.

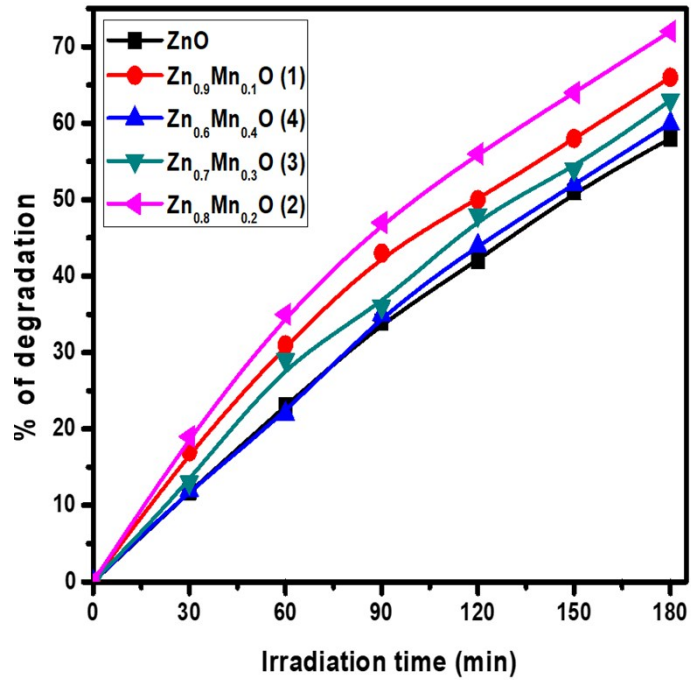

**Figure S5:** The degradation percentages of pure ZnO and 1-4 nanomaterials. catalyst amount=40 mg/L, Cr(VI) concentration= 30 ppm, Irradiation time=180 min.

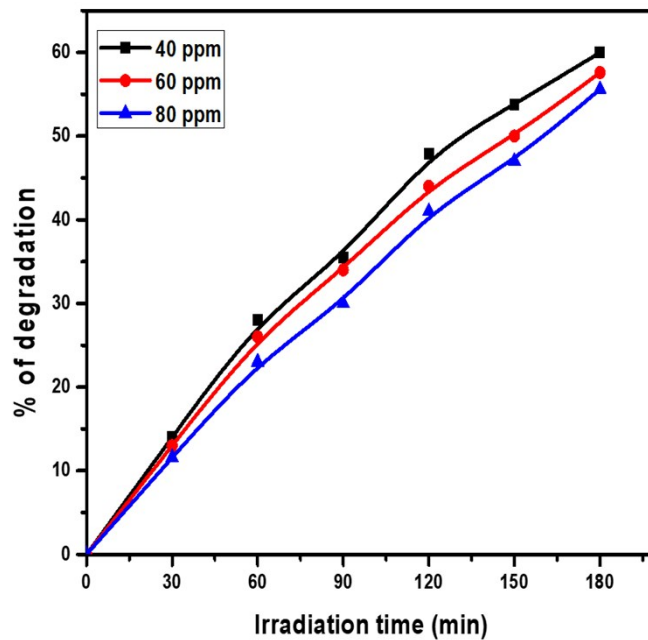

**Figure S6:** The percentages of degradation with different concentrations of Cr(VI). Irradiation time = 180 min. catalyst amount = 40 mg/L.

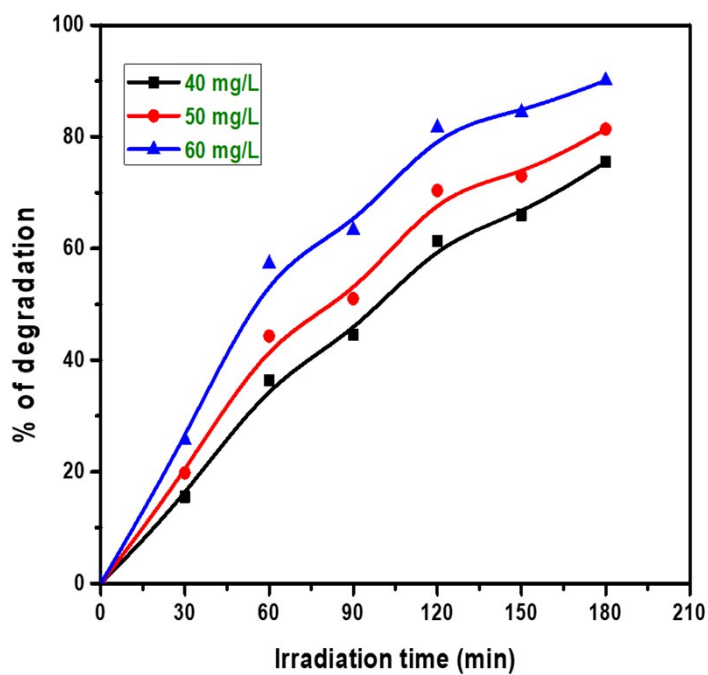

**Figure S7:** The degradation percentages with varying the catalyst amount. Irradiation time = 180 min. concentration of Cr(VI) = 40 ppm.

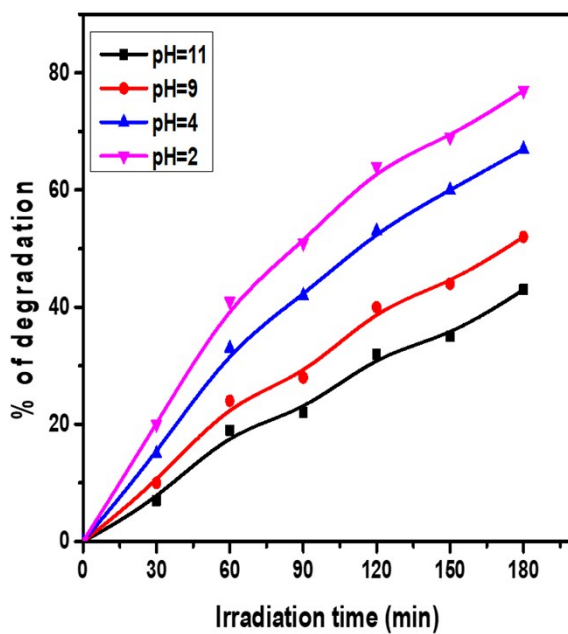

**Figure S8:** The degradation percentages of effect of pH on Cr(VI). Irradiation time = 180 minutes, catalyst amount = 40 mg/L, concentration of Cr(VI) = 40 ppm.

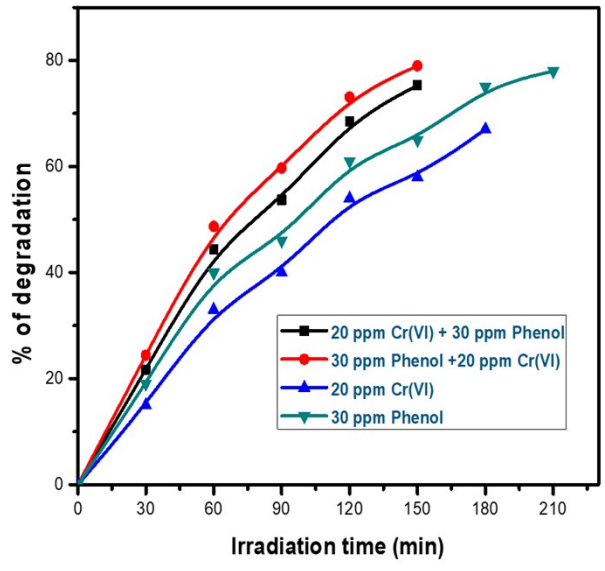

**Figure S9:** The degradation plots for individual and simultaneous oxidation of phenol and reduction of Cr(VI) in presence of ZnO: Mn (0.2%) photocatalyst.
